# Supplementary material for: Ozone catalytic oxidation for ammonia removal from simulated air at room temperature
Source: Royal Society of Chemistry journal article supplement (doi:10.1039/c4cy01269k), 2015-01-01
Supplement: c4cy01269k1.pdf [file c4cy01269k1.pdf]

1 **Ozone catalytic oxidation for ammonia removal from simulated air at**  
2 **room temperature**

3 Yang Liu<sup>a</sup>, Xiao-Song Li<sup>a</sup>, Jing-Lin Liu<sup>a</sup>, Chuan Shi<sup>a</sup>, Xiaobing Zhu<sup>a,\*</sup>, Ai-Min Zhu<sup>a</sup>,

4 Ben W.-L. Jang<sup>b,\*</sup>

5 *<sup>a</sup>Laboratory of Plasma Physical Chemistry, Dalian University of Technology, 116024 Dalian,*  
6 *China*

7 *<sup>b</sup>Department of Chemistry, Texas A&M University-Commerce, PO Box 3011, Commerce, TX*  
8 *75429, United States*

9 -----  
10 \* Corresponding authors. Fax: +86-411-84706094 (X. Zhu), +1-903-468-6020 (B.W.-L. Jang).  
11 E-mail addresses: xzhu@dlut.edu.cn (X. Zhu), Ben.Jang@tamuc.edu (B.W.-L. Jang).

12  
13 **Supplementary data**

14  
15 **Specific quantification methods of NO, NO<sub>2</sub> and N<sub>2</sub>**

16 The mass signal of a given molecule (M) at  $m/z$  ( $I_{m/z}^M$ ) could be obtained by eqn.

17 S(1):

18 
$$I_{m/z}^M = \eta_{m/z} \cdot C_M \cdot \sigma_M \cdot \beta_{m/z}^M \quad \text{S(1)}$$

19 where  $\eta_{m/z}$  is the detection constant of the mass spectrometer at  $m/z$ ;  $C_M$  is the  
20 concentration of M;  $\sigma_M$  is the total ionization cross section for M at 70 eV (the  
21 electron beam energy used in our mass spectrometer ionizer);  $\beta_{m/z}^M$  is the ratio of the  
22 partial ionization cross section of M generating the ion fragment with  $m/z$  to its total  
23 ionization cross section at 70 eV.  $\sigma_M$  could be acquired from the website of National  
24 Institute of Standards and Technology (NIST)<sup>1</sup> and  $\beta_{m/z}^M$  could be obtained from our

1 MS software.

2 The mass signals at  $m/z = 44$  and  $46$  ( $I_{44}$  and  $I_{46}$ ), derived from single contributor,  
3 are attributed to  $N_2O$  and  $NO_2$ , respectively,

$$4 \quad I_{44} = \eta_{44} \cdot C_{N_2O} \cdot \sigma_{N_2O} \cdot \beta_{44}^{N_2O} \quad S(2)$$

$$5 \quad I_{46} = \eta_{46} \cdot C_{NO_2} \cdot \sigma_{NO_2} \cdot \beta_{46}^{NO_2} \quad S(3)$$

6 However, the mass signal at  $m/z = 30$  ( $I_{30}$ ) derives from the contributions of  $N_2O$ ,  $NO_2$   
7 and  $NO$ , being the sum of  $I_{30}^{N_2O}$ ,  $I_{30}^{NO_2}$  and  $I_{30}^{NO}$ ,

$$8 \quad I_{30} = I_{30}^{N_2O} + I_{30}^{NO_2} + I_{30}^{NO} \quad S(4)$$

9 Their individual contributions,  $I_{30}^{N_2O}$ ,  $I_{30}^{NO_2}$  and  $I_{30}^{NO}$ , can be expressed as follows:

$$10 \quad I_{30}^{N_2O} = \eta_{30} \cdot C_{N_2O} \cdot \sigma_{N_2O} \cdot \beta_{30}^{N_2O} \quad S(5)$$

$$11 \quad I_{30}^{NO_2} = \eta_{30} \cdot C_{NO_2} \cdot \sigma_{NO_2} \cdot \beta_{30}^{NO_2} \quad S(6)$$

$$12 \quad I_{30}^{NO} = \eta_{30} \cdot C_{NO} \cdot \sigma_{NO} \cdot \beta_{30}^{NO} \quad S(7)$$

13 According to eqns. S(2) and S(5), we can get

$$14 \quad I_{30}^{N_2O} = \frac{\eta_{30}}{\eta_{44}} \cdot \frac{\beta_{30}^{N_2O}}{\beta_{44}^{N_2O}} \cdot I_{44} \quad S(8)$$

15 where  $\frac{\eta_{30}}{\eta_{44}} \approx \left(\frac{30}{44}\right)^{-0.5} = 1.21$ ,  $\beta_{30}^{N_2O} = 19\%$ ,  $\beta_{44}^{N_2O} = 62\%$ , thereby

$$16 \quad I_{30}^{N_2O} = 0.37 \cdot I_{44} \quad S(9)$$

17 Similarly, according to eqns. S(3) and S(6), eqn. S(10) was obtained

$$18 \quad I_{30}^{NO_2} = 3.35 \cdot I_{46} \quad S(10)$$

19 Therefore, based on eqns. S(4), S(9) and S(10),  $I_{30}^{NO}$  was obtained:

$$20 \quad I_{30}^{NO} = I_{30} - (0.37 \cdot I_{44}) - (3.35 \cdot I_{46}) \quad S(11)$$

21 According to eqns. S(2) and S(7), we can get

$$C_{\text{NO}} = \frac{\eta_{44}}{\eta_{30}} \cdot \frac{\sigma_{\text{N}_2\text{O}}}{\sigma_{\text{NO}}} \cdot \frac{\beta_{44}^{\text{N}_2\text{O}}}{\beta_{30}^{\text{NO}}} \cdot \frac{I_{30}^{\text{NO}}}{I_{44}} \cdot C_{\text{N}_2\text{O}} \quad \text{S(12)}$$

where  $\frac{\eta_{44}}{\eta_{30}} \approx \left(\frac{44}{30}\right)^{-0.5} = 0.83$ ,  $\sigma_{\text{N}_2\text{O}} = 3.7 \times 10^{-16} \text{ cm}^2$ ,  $\sigma_{\text{NO}} = 2.8 \times 10^{-16} \text{ cm}^2$ ,  $\beta_{44}^{\text{N}_2\text{O}} = 62\%$ ,  $\beta_{30}^{\text{NO}} = 88\%$ ,

eqn. S(12) could be simplified as

$$C_{\text{NO}} = 0.76 \cdot C_{\text{N}_2\text{O}} \cdot \frac{I_{30}^{\text{NO}}}{I_{44}} \quad \text{S(13)}$$

Substituting eqn. S(11) into eqn. S(13),

$$C_{\text{NO}} = 0.76 \cdot C_{\text{N}_2\text{O}} \cdot \left( \frac{I_{30}}{I_{44}} - 0.37 - 3.35 \cdot \frac{I_{46}}{I_{44}} \right) \quad \text{S(14)}$$

where  $C_{\text{N}_2\text{O}}$  and  $I_{30}$ ,  $I_{44}$  &  $I_{46}$  could be simultaneously acquired by the FT-IR spectrometer and mass spectrometer; therefore,  $C_{\text{NO}}$  could be obtained from eqn. S(14).

Similarly, the expressions of  $C_{\text{NO}_2}$  and  $C_{\text{N}_2}$  were yielded:

$$C_{\text{NO}_2} = 3.03 \cdot C_{\text{N}_2\text{O}} \cdot \frac{I_{46}}{I_{44}} \quad \text{S(15)}$$

$$C_{\text{N}_2} = 0.79 \cdot C_{\text{N}_2\text{O}} \cdot \left( \frac{I_{28}}{I_{44}} - 0.14 \right) \quad \text{S(16)}$$

For all the reactions to be discussed below, the outlet gaseous products were on-line analyzed by the FT-IR spectrometer and the mass spectrometer.

15

## 16 Reference

17 [1] NIST, <http://webbook.nist.gov/chemistry/form-ser.html>, (accessed June 2014).

18

1

2 **Fig. S1.** OZCO measurements of gaseous  $\text{NH}_3$  over AgMn/HZ catalyst to verify the  
3 reliability of  $\text{N}_2$  selectivity derived from eqn. (5). Time courses for (a)  $\text{NH}_3$   
4 conversion, (b)  $\text{N}_2\text{O}$  concentration, (c) MS signals, (d)  $\text{N}_2$  concentration and  
5 (e)  $\text{N}_2$  and  $\text{N}_2\text{O}$  selectivities during OZCO of gaseous  $\text{NH}_3$ . The  $\text{N}_2$   
6 selectivity was derived from the direct measurement (eqn. (6)). Conditions:  
7 0.2 g of AgMn/HZ catalyst, 500 SCCM of total flow rate with 1000 ppmv of  
8  $\text{NH}_3$  and 500 ppmv of  $\text{O}_3$ , 20 vol.% of  $\text{O}_2$  and Ar balanced.

9 **Fig. S2.**  $\text{NH}_3$  concentrations of HZ, Ag/HZ, Mn/HZ and AgMn/HZ catalysts during  
10 TPD measurements after 90-min OZCO of gaseous  $\text{NH}_3$ . OZCO conditions:  
11 0.1 g of catalysts, feed gas of 250 SCCM, containing 530 ppmv of  $\text{NH}_3$ , 450  
12 ppmv of  $\text{O}_3$ , 20 vol.% of  $\text{O}_2$  and balanced by  $\text{N}_2$ . TPD conditions: 0.03 g of  
13 the used catalysts, 100 SCCM of He,  $10\text{ }^\circ\text{C}\cdot\text{min}^{-1}$ .

14 **Fig. S3.** MS signals of (a) HZ, (b) Ag/HZ, (c) Mn/HZ and (d) AgMn/HZ catalysts  
15 during TPD measurements after 90-min OZCO of gaseous  $\text{NH}_3$ . OZCO and  
16 TPD conditions are the same as those in **Fig. S2**.

17 **Fig. S4.**  $\text{NH}_3$  concentrations of (a) HZ and (b) Ag/HZ catalysts during TPD  
18 measurements after 30-min OZCO of adsorbed  $\text{NH}_3$ .  $\text{NH}_3$  adsorption  
19 conditions: 0.1 g of catalysts, 540 ppmv of  $\text{NH}_3$  for 25-min adsorption;  
20 OZCO conditions: a feed gas of 250 SCCM containing 450 ppmv of  $\text{O}_3$ , 20  
21 vol.% of  $\text{O}_2$  and balanced by He. TPD conditions: 0.03 g of the used catalysts,  
22 100 SCCM of He,  $10\text{ }^\circ\text{C}\cdot\text{min}^{-1}$ .

1 **Fig. S5.** MS signals of (a) HZ, (b) Ag/HZ, (c) Mn/HZ and (d) AgMn/HZ catalysts  
2 during TPD measurements after 30-min OZCO of adsorbed NH<sub>3</sub>. NH<sub>3</sub>  
3 adsorption, OZCO and TPD conditions are the same as those in **Fig. S4.**  
4

1 **Fig. S1**

2

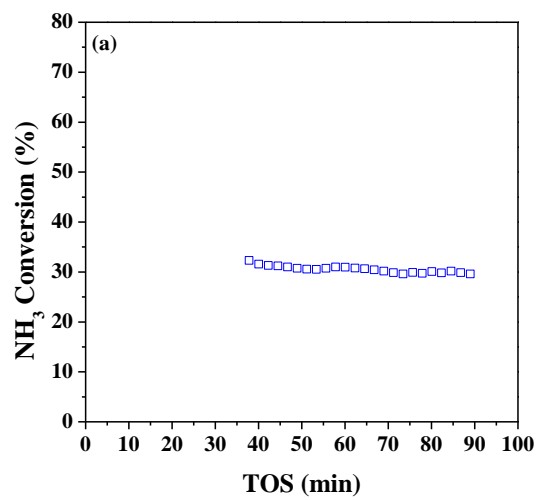

3

4

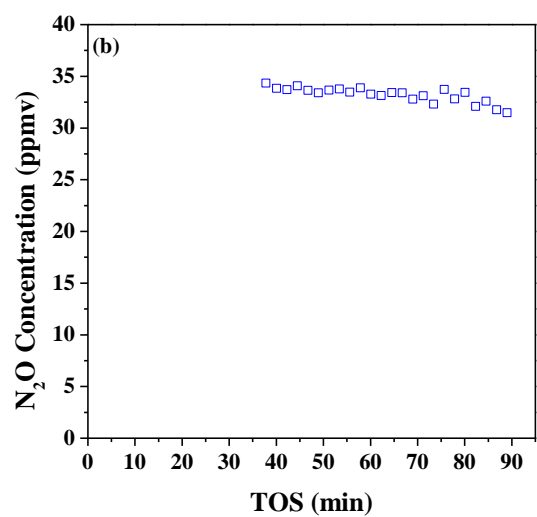

5

6

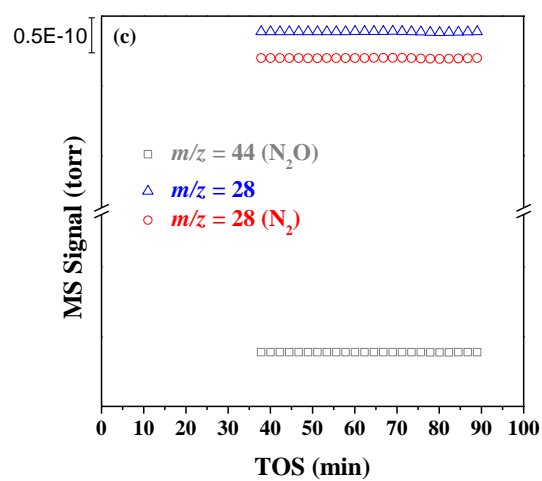

7

1 **Fig. S1**

2

3

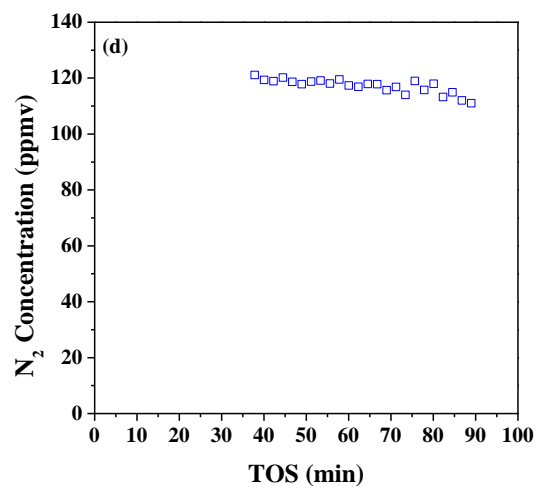

4

5

6

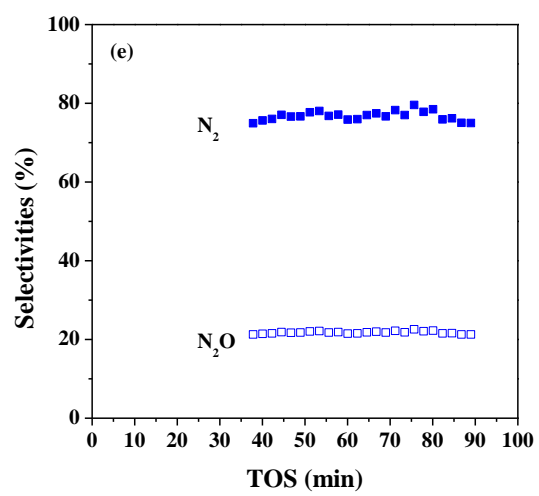

7

8

1 **Fig. S2**

2

3

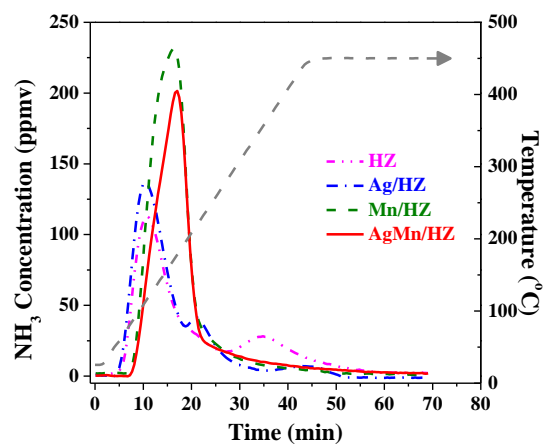

4

5



1 Fig. S3

2

3

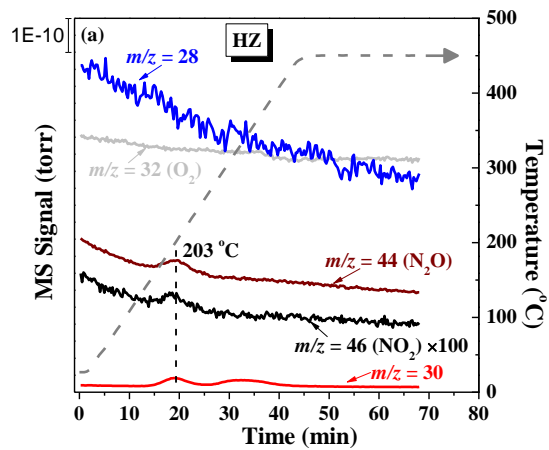

4

5

6

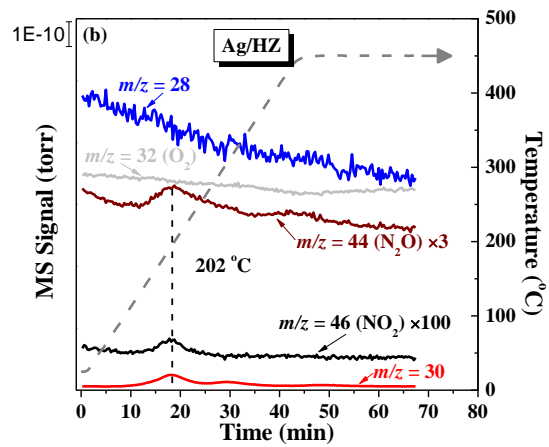

7

8

1 Fig. S3

2

3

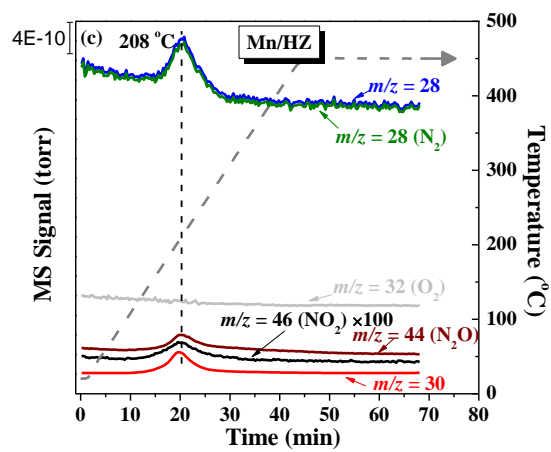

4

5

6

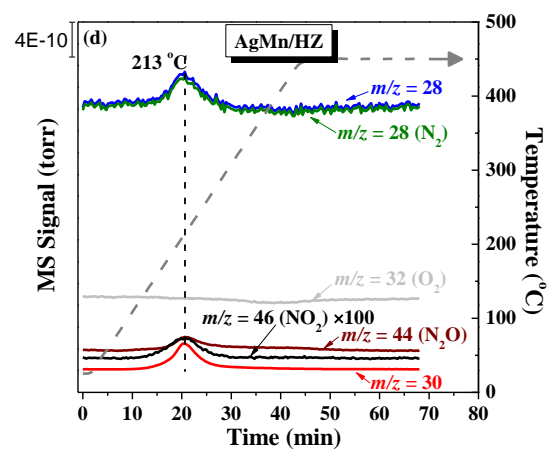

7

8

1 **Fig. S4**

2

3

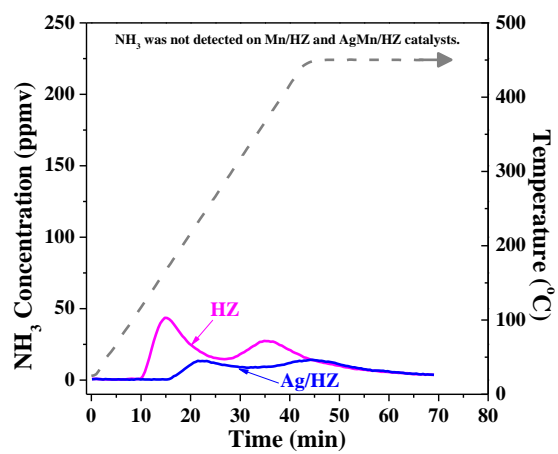

4

5

1 Fig. S5

2

3

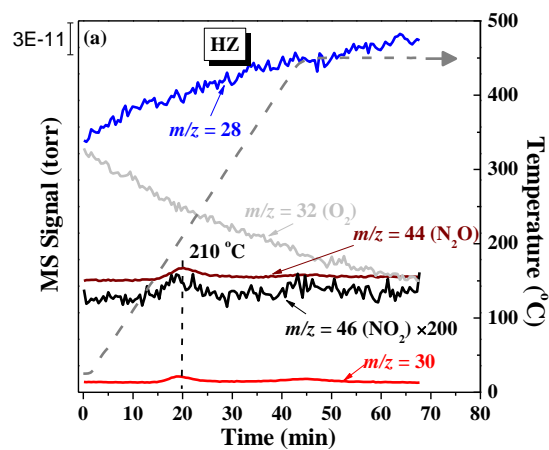

4

5

6

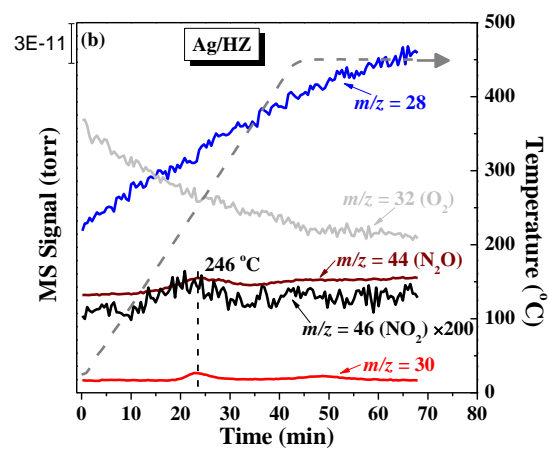

7

8

1 Fig. S5

2

3

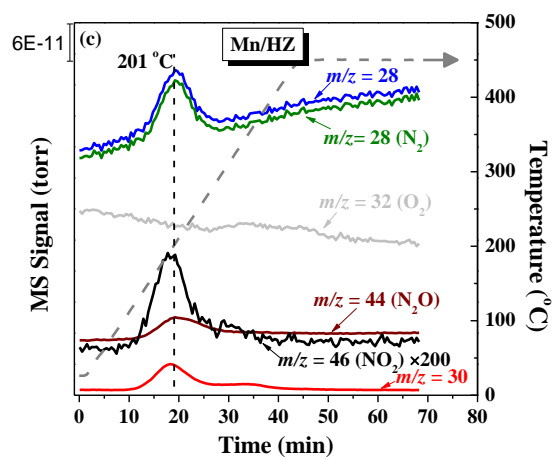

4

5

6

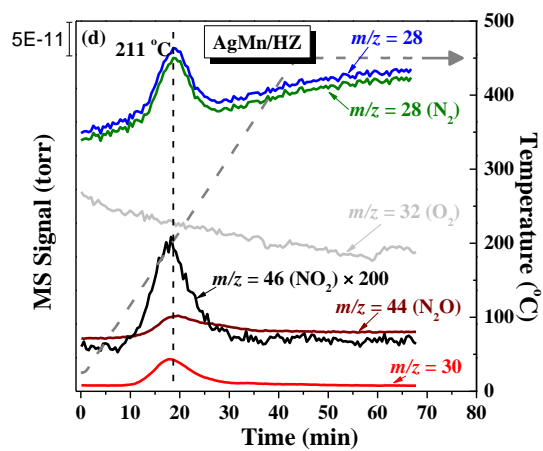

7
